# Supplementary material for: Sonochemically synthesized CuO-NPs: individual and synergistic toxicity assessment with sodium arsenite in adult zebrafish
Source: Royal Society of Chemistry journal article supplement (doi:10.1039/d5ra09469k), 2026-01-01
Supplement: d5ra09469k1.pdf [file d5ra09469k1.pdf]

## Supplementary Information

### Sonochemically Synthesized CuO NPs: Individual and Synergistic Toxicity Assessment with Sodium Arsenite in Adult Zebrafish

Aqsa Huma, Ameer Hamza, Mazhar Iqbal Zafar\*, Muhammad Babar Taj\*, Zeshan Sheikh,  
Naveed Khan, Imtiaz Ahmad Khan, Ahmed Atiullah, Muhammad Majid

### Supplementary Methodology

#### 1.0 Bliss independence model

The synergistic and antagonistic interaction between NaAsO<sub>2</sub> and CuO-NPs were quantified using Bliss independence model. It assumes that two toxicants acts independently through distinct mechanisms <sup>1</sup>. For each biochemical endpoints, the data were normalized to fractional responses (0-1 scale). The expected combined effects under independent action was calculated as:

$$\hat{y}_{AB} = y_A + y_B - y_A y_B$$

where  $y_A$  and  $y_B$  denote the fractional effects induced by NaAsO<sub>2</sub> and CuO-NPs alone respectively, and  $\hat{y}_{AB}$  is the predicted effect under independent action <sup>2</sup>

#### Mathematical test for synergy and antagonism

The observed combined effect ( $y_{AB}$ ) was obtained experimentally from the co-exposure group (NaAsO<sub>2</sub> + CuO-NPs). The interaction term is calculated as:

$$\Delta_{Bliss} = y_{AB} - \hat{y}_{AB}$$

or equivalently referred to as the Bliss Synergy Index (BSI):

$$BSI = y_{AB} - (y_A + y_B - y_A y_B)$$

According to the established criteria,  $BSI > 0$  indicates synergistic interaction,  $BSI = 0$  indicates additive (independent) interaction, and  $BSI < 0$  indicates antagonistic interaction <sup>2, 3</sup>. This deviation-based formulation is applicable to single-concentration mixture designs.

## Supplementary Tables

| Table S1 Average crystallite size calculation using Debye Scherrer equation |            |              |              |            |                      |             |                                   |        |                                   |
|-----------------------------------------------------------------------------|------------|--------------|--------------|------------|----------------------|-------------|-----------------------------------|--------|-----------------------------------|
| 2 $\theta$                                                                  | FWHM (Deg) | ( $\theta$ ) | Cos $\theta$ | FWHM (Rad) | $\beta$ Cos $\theta$ | K $\lambda$ | $k\lambda/\beta$ Cos $\theta$ (Å) | D (nm) | D (nm)                            |
| 32.5                                                                        | 0.852      | 16.25        | 0.960        | 0.015      | 0.014                | 1.386       | 97.069                            | 9.706  | Average particle size is 10.56 nm |
| 35.4                                                                        | 35.511     | 17.70        | 0.952        | 0.620      | 0.590                | 1.386       | 2.349                             | 0.235  |                                   |
| 35.5                                                                        | 0.505      | 17.75        | 0.952        | 0.009      | 0.008                | 1.386       | 165.333                           | 16.533 |                                   |
| 38.7                                                                        | 38.756     | 19.35        | 0.944        | 0.677      | 0.638                | 1.386       | 2.171                             | 0.217  |                                   |
| 38.9                                                                        | 0.486      | 19.45        | 0.942        | 0.009      | 0.008                | 1.386       | 173.352                           | 17.335 |                                   |
| 46.1                                                                        | 0.638      | 23.05        | 0.920        | 0.011      | 0.010                | 1.386       | 135.243                           | 13.524 |                                   |
| 48.8                                                                        | 0.526      | 24.40        | 0.910        | 0.009      | 0.008                | 1.386       | 165.791                           | 16.579 |                                   |
| 51.3                                                                        | 2.193      | 25.65        | 0.901        | 0.038      | 0.035                | 1.386       | 40.197                            | 4.020  |                                   |
| 53.5                                                                        | 1.098      | 26.75        | 0.892        | 0.019      | 0.017                | 1.386       | 81.076                            | 8.107  |                                   |
| 58.3                                                                        | 0.719      | 29.15        | 0.873        | 0.013      | 0.011                | 1.386       | 126.556                           | 12.656 |                                   |
| 61.5                                                                        | 0.612      | 30.75        | 0.859        | 0.011      | 0.009                | 1.386       | 151.111                           | 15.111 |                                   |
| 65.2                                                                        | 0.724      | 32.60        | 0.842        | 0.013      | 0.011                | 1.386       | 130.237                           | 13.024 |                                   |
| 66.3                                                                        | 1.056      | 33.15        | 0.837        | 0.018      | 0.015                | 1.386       | 89.834                            | 8.983  |                                   |
| 68.1                                                                        | 0.812      | 34.05        | 0.828        | 0.014      | 0.012                | 1.386       | 118.036                           | 11.803 |                                   |

## Supplementary References

1. C. I. Bliss, *Annals of applied biology*, 1939, **26**, 585-615.
2. Q. Liu, X. Yin, L. R. Languino and D. C. Altieri, *Statistics in biopharmaceutical research*, 2018, **10**, 112-122.
3. W. R. Greco, *Pharmacol Rev*, 1995, **47**, 331-385.
